# Supplementary material
Source: PubMed Central journal article supplement (PMC3146585)
Supplement: NIHMS311143-supplement-01.pdf [file NIHMS311143-supplement-01.pdf]

## Supplementary Information

**Supplementary Table 1: gamma crystallins of several fish, frog, newt, and lizard**

| protein                                          | accession number | $dn/dc$ (ml/g) |
|--------------------------------------------------|------------------|----------------|
| gamma-crystallin M15 (spotted green puffer fish) | CAF93847         | 0.2042         |
| gamma-crystallin S1 (spotted green puffer fish)  | CAG02609         | 0.1994         |
| gamma-crystallin S2 (spotted green puffer fish)  | CAG02610         | 0.2003         |
| gamma-crystallin M3 (spotted green puffer fish)  | CAG02611         | 0.1991         |
| gamma-crystallin M5 (spotted green puffer fish)  | CAG02612         | 0.1972         |
| gamma-crystallin M11 (spotted green puffer fish) | CAG02613         | 0.1976         |
| gamma-crystallin M10 (spotted green puffer fish) | CAG02614         | 0.1999         |
| gamma-crystallin M12 (spotted green puffer fish) | CAG02615         | 0.2009         |
| gamma-crystallin M13(spotted green puffer fish)  | CAG02616         | 0.1996         |
| gamma-crystallin M9 (spotted green puffer fish)  | CAG02617         | 0.2010         |
| gamma-crystallin M1 (spotted green puffer fish)  | CAG02618         | 0.2016         |
| gamma-crystallin S3 (spotted green puffer fish)  | CAG02620         | 0.2023         |
| gamma-crystallin M2 (spotted green puffer fish)  | CAG08130         | 0.2001         |
| gamma-crystallin M14 (spotted green puffer fish) | CAG06606         | 0.2011         |
| gamma-crystallin N (spotted green puffer fish)   | CAG05337         | 0.1999         |
| gamma-crystallin M1 (carp)                       | CAA31387         | 0.2038         |
| gamma-crystallin M2 (carp)                       | CAA31388         | 0.2062         |
| gamma-crystallin M3 (carp)                       | CAA39414         | 0.2019         |
| gamma-crystallin M2-1 (catfish)                  | CAA54810         | 0.2070         |
| gamma-crystallin M2-1 (catfish)                  | CAA54811         | 0.2054         |
| gamma-crystallin S1 (catfish)                    | CAA57214         | 0.2069         |
| gamma-crystallin S2 (catfish)                    | CAA57215         | 0.2050         |
| gamma-crystallin N (lizard)                      | AAL40970         | 0.2006         |
| gamma-crystallin S (lizard)                      | AAV54036         | 0.1997         |
| gamma-crystallin 2 (newt)                        | BAE47571         | 0.2031         |
| gamma-crystallin 1 (newt)                        | BAB85813         | 0.2033         |
| gamma-crystallin 3 (frog)                        | AAA99923         | 0.2050         |
| gamma-crystallin 5 (frog)                        | AAH87384         | 0.2060         |
| gamma-crystallin B (frog)                        | NP_001080636     | 0.2058         |
| gamma-crystallin 2 (frog)                        | NP_001087368     | 0.2039         |
| gamma-crystallin 1 (frog)                        | NP_001087309     | 0.2057         |
| gamma-crystallin 4 (frog)                        | NP_001087344     | 0.2051         |
| gamma-crystallin S1 (toothfish)                  | ABA61348         | 0.2018         |
| gamma-crystallin S2 (toothfish)                  | ABA61349         | 0.2000         |
| gamma-crystallin M1 (toothfish)                  | ABA61350         | 0.2005         |
| gamma-crystallin M2b (toothfish)                 | ABA61351         | 0.2005         |
| gamma-crystallin M2c (toothfish)                 | ABA61352         | 0.2003         |
| gamma-crystallin M5a (toothfish)                 | ABA61353         | 0.1971         |

|                                       |          |        |
|---------------------------------------|----------|--------|
| gamma-crystallin M5b (toothfish)      | ABA61354 | 0.1988 |
| gamma-crystallin M5c (toothfish)      | ABA61355 | 0.1960 |
| gamma-crystallin M7 (toothfish)       | ABA61356 | 0.1988 |
| gamma-crystallin M8b (toothfish)      | ABA61357 | 0.2001 |
| gamma-crystallin M8c (toothfish)      | ABA61358 | 0.2001 |
| gamma-crystallin M8d (toothfish)      | ABA61359 | 0.1993 |
| beta gamma-crystallin M8a (toothfish) | ABB59450 | 0.2001 |
| gamma-crystallin N (toothfish)        | ABV80231 | 0.1988 |

---

**Supplemental Figure 1**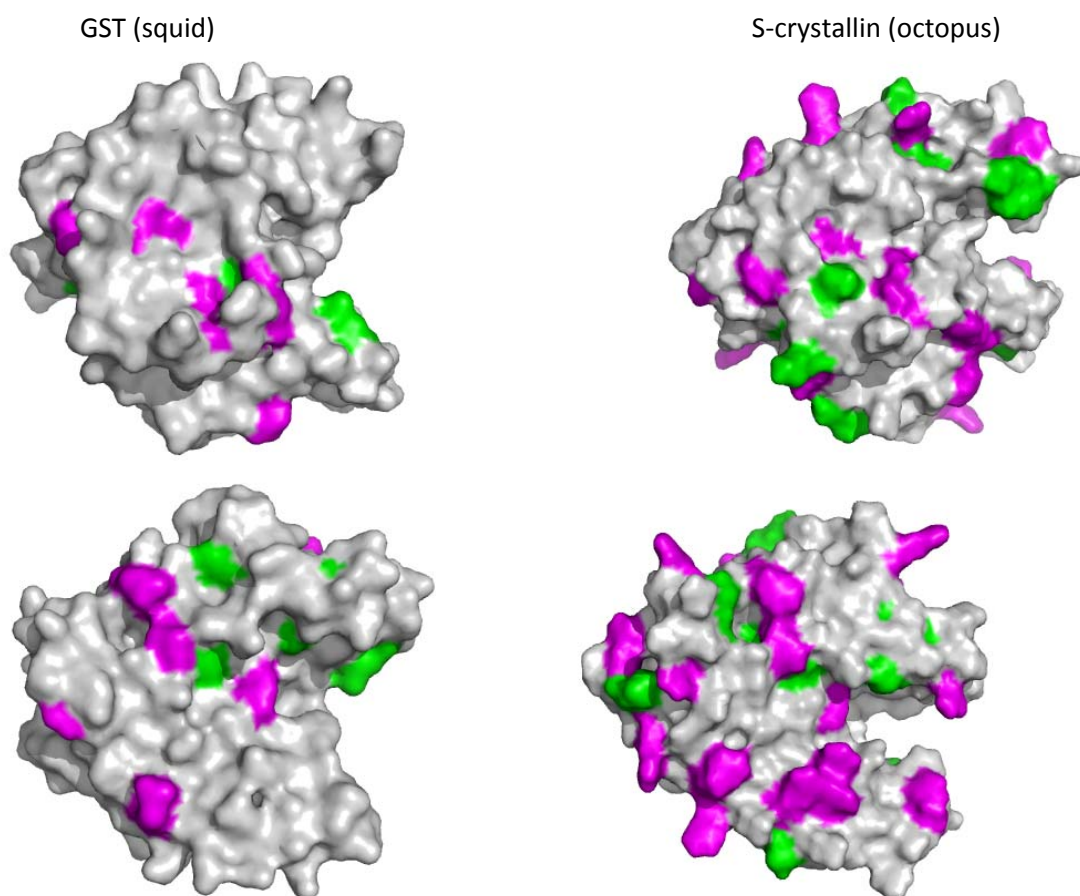

Surface representation viewed from two opposite angles of squid GST (1GSQ) and a modeled structure of octopus S-crystallin OctS3 (reported in Chuang, C. C., S. H. Wu, et al. (1999). "Homology modeling of cephalopod lens S-crystallin: a natural mutant of sigma-class glutathione transferase with diminished endogenous activity." *Biophys J* **76**(2): 679-90; structure kindly provided by Dr. G. G. Chang). Highlighted residues are arginine (magenta) and methionine (green).
